# Supplementary material for: Prevalence and determinants of oral health conditions and treatment needs among slum and non-slum urban residents: Evidence from Nigeria
Source: PubMed Central journal article supplement (PMC10021815; doi:10.1371/journal.pgph.0000297), 2022-04-22
Supplement: pgph.0000297.s006.pdf [file pgph.0000297.s006.pdf]

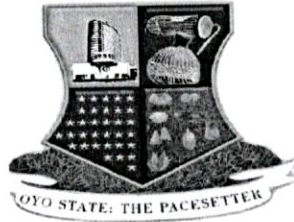

**MINISTRY OF HEALTH**  
**DEPARTMENT OF PLANNING, RESEARCH & STATISTICS DIVISION**  
**PRIVATE MAIL BAG NO. 5027, OYO STATE OF NIGERIA**

Your Ref. No. ....

All communications should be addressed to

the Honorable Commissioner quoting

Our Ref. No. AD 13/479/ 1247

7<sup>th</sup> May, 2019

The Principal Investigator,  
 Department of Periodontology and Community Dentistry,  
 College of Medicine,  
 University of Ibadan,  
 Ibadan.

**Attention: Osuh Mary**

**ETHICS APPROVAL FOR THE IMPLEMENTATION  
 OF YOUR RESEARCH PROPOSAL IN OYO STATE**

This is to acknowledge that your Research Proposal titled: "Determinants of Oral Diseases and Oral Health Care Needs in Slums: A Comparative Study with Non-slum Urban Settings in Nigeria." has been reviewed by the Oyo State Ethics Review Committee.

2. The committee has noted your compliance. In the light of this, I am pleased to convey to you the full approval by the committee for the implementation of the Research Proposal in Oyo State, Nigeria.

3. Please note that the National Code for Health Research Ethics requires you to comply with all institutional guidelines, rules and regulations, in line with this, the Committee will monitor closely and follow up the implementation of the research study. However, the Ministry of Health would like to have a copy of the results and conclusions of findings as this will help in policy making in the health sector.

4. Wishing you all the best.

Signature & Date  
 Dr. Abbas Gbolahan  
 Director, Planning, Research & Statistics  
 Secretary, Oyo State, Research Ethics Review Committee
